# Supplementary material
Source: ML conference proceedings conference paper supplement (https://proceedings.neurips.cc/paper_files/paper/2015/hash/ca9c267dad0305d1a6308d2a0cf1c39c-Abstract.html)
Supplement: Supplementary file [file ca9c267dad0305d1a6308d2a0cf1c39c-Supplemental.zip]

## A Proofs

In order to prove Lemma 1, we use the following result which is a modification of [11]. In particular, the following lemma is a generalization of Theorem 5.1 from [11], and its proof (omitted here) follows from generalizing the proof of that theorem.

**Lemma 4.** *Suppose  $\psi_1, \dots, \psi_n : \mathbb{R}^d \rightarrow \mathbb{R}$  are random functions drawn iid from a distribution. Let  $P = \mathbb{E}[\psi_i]$  and  $Q : \mathbb{R}^d \rightarrow \mathbb{R}$  be another function. Let*

$$\hat{\theta} = \operatorname{argmin}_{\theta \in \mathcal{S}} \sum_i \psi_i(\theta), \text{ and } \theta^* = \operatorname{argmin}_{\theta \in \mathcal{S}} P(\theta).$$

*Assume:*

1. (Convexity of  $\psi$ ): Assume that  $\psi$  is convex (with probability one),
2. (Smoothness of  $\psi$ ): Assume that  $\psi$  is smooth in the following sense: the first, second and third derivatives exist at all interior points of  $\mathcal{S}$  (with probability one),
3. (Regularity conditions): Suppose
  - (a)  $\mathcal{S}$  is compact,
  - (b)  $\theta^*$  is an interior point of  $\mathcal{S}$ ,
  - (c)  $\nabla^2 P(\theta^*)$  is positive definite (and hence invertible),
  - (d)  $\nabla Q(\theta^*) = 0$ ,
  - (e) There exists a neighborhood  $B$  of  $\theta^*$  and a constant  $\widetilde{L}_3$  such that (with probability one),  $\nabla^2 \psi(\theta)$  and  $\nabla^2 Q(\theta)$  are  $\widetilde{L}_3$  Lipschitz, namely

$$\begin{aligned} \left\| (\nabla^2 P(\theta^*))^{-1/2} (\nabla^2 \psi(\theta) - \nabla^2 \psi(\theta')) (\nabla^2 P(\theta^*))^{-1/2} \right\|_2 &\leq \widetilde{L}_3 \|\theta - \theta'\|_{\nabla^2 P(\theta^*)}, \text{ and} \\ \left\| (\nabla^2 Q(\theta^*))^{-1/2} (\nabla^2 Q(\theta) - \nabla^2 Q(\theta')) (\nabla^2 Q(\theta^*))^{-1/2} \right\|_2 &\leq \widetilde{L}_3 \|\theta - \theta'\|_{\nabla^2 P(\theta^*)}, \end{aligned}$$

for  $\theta, \theta' \in B$ ,

4. (Concentration at  $\theta^*$ ) Suppose  $\|\nabla \psi(\theta^*)\|_{\nabla^2 P(\theta^*)^{-1}} \leq \widetilde{L}_1$  and

$$\left\| (\nabla^2 P(\theta^*))^{-1/2} \nabla^2 \psi(\theta^*) (\nabla^2 P(\theta^*))^{-1/2} \right\|_2 \leq \widetilde{L}_2$$

hold with probability one.

Choose  $p \geq 2$  and define

$$\epsilon_n \stackrel{\text{def}}{=} \widetilde{c}(\widetilde{L}_1 \widetilde{L}_3 + \sqrt{\widetilde{L}_2}) \sqrt{\frac{p \log dn}{n}},$$

where  $\widetilde{c}$  is an appropriately chosen constant. Let  $\widetilde{c}$  be another appropriately chosen constant. If  $n$  is large enough so that  $\sqrt{\frac{p \log dn}{n}} \leq \widetilde{c} \min \left\{ \frac{1}{\sqrt{\widetilde{L}_2}}, \frac{1}{\widetilde{L}_1 \widetilde{L}_3}, \frac{\text{diameter}(B)}{\widetilde{L}_1} \right\}$ , then:

$$(1 - \epsilon_n) \frac{\tau^2}{n} - \frac{\widetilde{L}_1^2}{n^{p/2}} \leq \mathbb{E} [Q(\hat{\theta}) - Q(\theta^*)] \leq (1 + \epsilon_n) \frac{\tau^2}{n} + \frac{\max_{\theta \in \mathcal{S}} Q(\theta) - Q(\theta^*)}{n^p},$$

where

$$\tau^2 \stackrel{\text{def}}{=} \frac{1}{n^2} \operatorname{Tr} \left( \left( \sum_{i,j} \mathbb{E} [\nabla \psi_i(\theta^*) \nabla \psi_j(\theta^*)^\top] \right) P(\theta^*)^{-1} Q(\theta^*) P(\theta^*)^{-1} \right).$$

The following lemma is a fundamental result relating the variance of the gradient of the log likelihood to Fisher information matrix for a large class of probability distributions [17].

**Lemma 5.** Suppose  $L$  satisfies the regularity conditions in Assumptions 1 and 2. Then, for any example  $x$ , we have:

$$\mathbb{E}_{p(y|x, \theta^*)} \left[ \nabla L(Y|x, \theta^*) \nabla L(Y|x, \theta^*)^\top \right] = \nabla^2 I_x(\theta^*).$$

We now prove Lemma 1.

(Proof of Lemma 1). We first define

$$\psi_i(\theta) = L(Y|X, \theta),$$

where  $X \sim \Gamma$  and  $Y \sim p(Y|X, \theta^*)$  for  $i = 1, \dots, m_2$  and  $Q(\theta) \stackrel{\text{def}}{=} L_U(\theta)$ . Using the notation of Lemma 4, this means that

$$\nabla^2 P(\theta^*) = I_\Gamma(\theta^*) \text{ and } \nabla^2 Q(\theta^*) = I_U(\theta^*).$$

Using the regularity conditions from Section 4 and the hypothesis that  $I_\Gamma(\theta^*) \succeq c I_U(\theta^*)$ , we see that this satisfies the hypothesis of Lemma 4 with constants

$$(\widetilde{L}_1, \widetilde{L}_2, \widetilde{L}_3) = (L_1/\sqrt{c}, L_2/c, L_3/c^{3/2})$$

We now apply Lemma 4 to conclude that for large enough  $m_2$ , we have:

$$(1 - \epsilon_{m_2})\tau^2/m_2 - \frac{L_1^2}{cm_2^{p/2}} \leq \mathbb{E} \left[ L_U(\hat{\theta}) - L_U(\theta^*) \right] \leq (1 + \epsilon_{m_2})\tau^2/m_2 + \frac{R}{m_2^p},$$

where

$$\epsilon_{m_2} = \mathcal{O} \left( \left( \widetilde{L}_1 \widetilde{L}_3 + \sqrt{\widetilde{L}_2} \right) \sqrt{\frac{p \log dm_2}{m_2}} \right) = \mathcal{O} \left( \frac{1}{c^2} \left( L_1 L_3 + \sqrt{L_2} \right) \sqrt{\frac{p \log dm_2}{m_2}} \right) \text{ and}$$

$$\tau^2 \stackrel{\text{def}}{=} \text{Tr} \left( \mathbb{E} \left[ \nabla \widehat{P}(\theta^*) \nabla \widehat{P}(\theta^*)^\top \right] I_\Gamma(\theta^*)^{-1} I_U(\theta^*) I_\Gamma(\theta^*)^{-1} \right) = \text{Tr} \left( I_\Gamma(\theta^*)^{-1} I_U(\theta^*) \right),$$

using Lemma 5 in the last step.  $\square$

We now prove Lemma 2.

(Proof of Lemma 2). Define

$$\psi_i(\theta) \stackrel{\text{def}}{=} L(Y|X, \theta),$$

where  $X \sim U$  and  $Y \sim p(Y|X, \theta^*)$  for  $i = 1, \dots, m_1$  and  $Q(\theta) \stackrel{\text{def}}{=} \|\theta - \theta^*\|_2^2$ . Using the regularity conditions from Section 4, we see that this satisfies the hypothesis of Lemma 4 with constants

$$(\widetilde{L}_1, \widetilde{L}_2, \widetilde{L}_3) = (L_1, L_2, \max \left( L_3, \frac{1}{\sqrt{\sigma_{\min}}} \right))$$

We now apply Lemma 4 to conclude that

$$\mathbb{E} \left[ \|\theta_1 - \theta^*\|_2^2 \right] \leq (1 + \epsilon_{m_1})\tau^2/m_1 + \frac{\text{diameter}(\Theta)}{m_1^2},$$

where  $\epsilon_{m_1} = \mathcal{O} \left( \left( L_1 \max \left( L_3, \frac{1}{\sqrt{\sigma_{\min}}} \right) + \sqrt{L_2} \right) \sqrt{\frac{\log dm_1}{m_1}} \right)$ , and

$$\tau^2 \stackrel{\text{def}}{=} \text{Tr} \left( \mathbb{E} \left[ \nabla \widehat{L}_U(\theta^*) \nabla \widehat{L}_U(\theta^*)^\top \right] I_U(\theta^*)^{-2} \right) = \text{Tr} \left( I_U(\theta^*)^{-1} \right),$$

using Lemma 5 in the last step. By the choice of  $m_1$ , we have that

$$\mathbb{E} \left[ \|\theta_1 - \theta^*\|_2^2 \right] \leq 2\tau^2/m_1.$$

Markov's inequality then tells us that with probability at least  $1 - \delta$ , we have:

$$\|\theta_1 - \theta^*\|_2^2 \leq \frac{2\tau^2}{\delta m_1} \leq \frac{1}{\beta^2 L_4^2}.$$

Using Assumption 2 on point-wise self concordancy of  $I(x, \theta)$  now finishes the proof.  $\square$

(Proof of Theorem 1). The proof is a careful combination of Lemmas 1, 2 and 3.

**Lower Bound:** For any  $\Gamma$  that satisfies  $I_\Gamma(\theta^*) \succeq cI_U(\theta^*)$ , we can apply Lemma 1 to write:

$$\mathbb{E} \left[ L_U(\hat{\theta}_\Gamma) - L_U(\theta^*) \right] \geq (1 - \epsilon_{m_2}) \frac{\text{Tr}(I_\Gamma(\theta^*)^{-1} I_U(\theta^*))}{m_2} - \frac{L_1^2}{cm_2^2}.$$

The lower bound follows.

**Upper Bound:** We begin by showing that if Assumptions 1 and 2 are satisfied, then, from Lemma 2, we have that with probability  $\geq 1 - \delta$ , it holds that:

$$\frac{\beta - 1}{\beta} I(x, \theta^*) \preceq I(x, \theta_1) \preceq \frac{\beta + 1}{\beta} I(x, \theta^*) \quad \forall x \in U$$

with probability  $\geq 1 - \delta$ . This means that the following hold for distributions  $\Gamma_1$ ,  $\Gamma^*$  and  $U$ :

$$\frac{\beta - 1}{\beta} I_{\Gamma_1}(\theta^*) \preceq I_{\Gamma_1}(\theta_1) \preceq \frac{\beta + 1}{\beta} I_{\Gamma_1}(\theta^*), \quad (5)$$

$$\frac{\beta - 1}{\beta} I_{\Gamma^*}(\theta^*) \preceq I_{\Gamma^*}(\theta_1) \preceq \frac{\beta + 1}{\beta} I_{\Gamma^*}(\theta^*), \text{ and} \quad (6)$$

$$\frac{\beta - 1}{\beta} I_U(\theta^*) \preceq I_U(\theta_1) \preceq \frac{\beta + 1}{\beta} I_U(\theta^*). \quad (7)$$

Since  $\bar{\Gamma} = \alpha\Gamma_1 + (1 - \alpha)U$ , we have that  $I_{\bar{\Gamma}}(\theta^*) \succeq \alpha I_{\Gamma_1}(\theta^*)$  which further implies that  $I_{\bar{\Gamma}}(\theta^*)^{-1} \preceq \frac{1}{\alpha} I_{\Gamma_1}(\theta^*)^{-1}$ . Similarly, since  $I_{\bar{\Gamma}}(\theta^*) \succeq (1 - \alpha)I_U(\theta^*)$ , we can apply Lemma 1 on  $\bar{\Gamma}$  to get:

$$\begin{aligned} \mathbb{E} [L_U(\theta_2) - L_U(\theta^*)] &\leq (1 + \hat{\epsilon}_{m_2}) \frac{\text{Tr}(I_{\bar{\Gamma}}(\theta^*)^{-1} I_U(\theta^*))}{m_2} + \frac{R}{m_2^2} \leq \frac{1}{\alpha} (1 + \hat{\epsilon}_{m_2}) \frac{\text{Tr}(I_{\Gamma_1}(\theta^*)^{-1} I_U(\theta^*))}{m_2} + \frac{R}{m_2^2} \\ &\leq (1 + \tilde{\epsilon}_{m_2}) \frac{\text{Tr}(I_{\Gamma_1}(\theta^*)^{-1} I_U(\theta^*))}{m_2} + \frac{R}{m_2^2}, \end{aligned}$$

where  $\hat{\epsilon}_{m_2}, \tilde{\epsilon}_{m_2} = \mathcal{O} \left( \frac{1}{(1 - \alpha)^2} (L_1 L_3 + \sqrt{L_2}) \sqrt{\frac{\log dm_2}{m_2}} \right) = \mathcal{O} \left( (L_1 L_3 + \sqrt{L_2}) \frac{\sqrt{\log dm_2}}{m_2^{1/6}} \right)$ .

From (5) and (7), the right hand side is at most:

$$(1 + \tilde{\epsilon}_{m_2}) \left( \frac{\beta + 1}{\beta - 1} \right)^2 \frac{\text{Tr}(I_{\Gamma_1}(\theta_1)^{-1} I_U(\theta_1))}{m_2} + \frac{R}{m_2^2}$$

By definition of  $\Gamma_1$ , this is at most:

$$(1 + \tilde{\epsilon}_{m_2}) \left( \frac{\beta + 1}{\beta - 1} \right)^2 \frac{\text{Tr}(I_{\Gamma^*}(\theta_1)^{-1} I_U(\theta_1))}{m_2} + \frac{R}{m_2^2}$$

Finally, applying (6) and (7), we get that this is at most:

$$(1 + \tilde{\epsilon}_{m_2}) \left( \frac{\beta + 1}{\beta - 1} \right)^4 \frac{\text{Tr}(I_{\Gamma^*}(\theta^*)^{-1} I_U(\theta^*))}{m_2} + \frac{R}{m_2^2}$$

The upper bound follows.  $\square$
